# Supplementary material
Source: PubMed Central journal article supplement (PMC3910634)
Supplement: 1314326111_pnas.201314326SI.pdf [file 1314326111_pnas.201314326SI.pdf]

# Supporting Information

Snijder et al. 10.1073/pnas.1314326111

## SI Experimental Procedures

**Expression and Purification of KaiC and KaiB.** The recombinant *Synechococcus* GST (GST)-KaiB and GST-KaiC proteins were produced in *Escherichia coli* BL21 strains, kindly provided by T. Kondo, Nagoya University, Nagoya, Japan. Expression was carried out for 72 h (GST-KaiC) or 20 h (GST-KaiB) at 37 °C in Terrific Broth medium containing 100  $\mu\text{g}\cdot\text{mL}^{-1}$  ampicillin. GST-KaiB expression was induced by 1 mM isopropyl  $\beta$ -D-1-thiogalactopyranoside. Cell lysis was performed in ice-cold extraction buffer [50 mM Tris-HCl, pH 8.0, 150 mM NaCl, 0.5 mM EDTA, and 1 mM DTT (5 mM  $\text{MgCl}_2$  and 1 mM ATP for purification of KaiC)]. GST-KaiB and GST-KaiC were bound to Protino Glutathione Agarose 4B (Macherey-Nagel) and cleaved of their GST tag by incubation with PreScission protease (GE Healthcare) in cleavage buffer [50 mM Tris-HCl, pH 8.0, 150 mM NaCl, 1 mM EDTA, and 1 mM DTT (5 mM  $\text{MgCl}_2$  and 0.5 mM ATP for purification of KaiC)]. If homogeneity of the affinity-purified proteins was not sufficient, they were further purified by ion-exchange chromatography. For this, KaiB or KaiC were applied to a MonoQ 5/50 GL or ResourceQ column (GE Healthcare) and eluted with 20 column volumes of a 0–1 M NaCl gradient in elution buffer [50 mM Tris-HCl, pH 8.0, 1 mM EDTA, and 1 mM DTT (5 mM  $\text{MgCl}_2$  and 0.5 mM ATP for purification of KaiC)]. Purified proteins were dialyzed in reaction buffer (RB) (20 mM Tris-HCl, pH 8, 150 mM NaCl, 0.5 mM EDTA, 5 mM  $\text{MgCl}_2$ , and 1 mM ATP) using Vivaspin ultrafiltration spin columns (Satorius Stedim). Protein concentrations were determined using the Lowry or Bradford method.

**Native PAGE and SDS/PAGE Analyses.** To analyze KaiC/KaiBC complexes, the recombinant Kai proteins were incubated in RB as described in *Results*, mixed with 2 $\times$  sample buffer (100 mM NaCl, 100 mM imidazole, 4 mM 6-aminocaproic acid, 2 mM EDTA, 0.02% Ponceau S, and 20% glycerol) and applied to SERVAGEIN 4–16 vertical native gels (SERVA Electrophoresis GmbH). Electrophoresis was performed overnight at 4 °C using 50 mM BisTris, pH 7.0, as anode buffer and 50 mM Tricine, 15 mM BisTris, and 1 mM ATP as cathode buffer. Separated protein complexes were stained with Coomassie brilliant blue. To determine KaiC's phosphorylation state under the conditions indicated in Fig. 2, aliquots of the reaction mixtures containing 0.75, 1, 1.5, and 2  $\mu\text{g}$  KaiC were mixed with SDS sample buffer and heated for 5 min at 95 °C. Denatured proteins were electrophoretically separated in polyacrylamide gels (11% T and 0.67% C). Phosphoforms of KaiC were visualized by Coomassie staining and analyzed by Molecular Imager ChemiDoc XRS+ (Bio-Rad) and ImageLab software (Bio-Rad).

**Native MS.** KaiB, KaiC, and KaiCB mixtures were prepared and incubated in RB as indicated in *Results*. Before MS, samples were transferred to an MS-compatible buffer of 75 mM ammonium acetate, pH 6.8, using Vivaspin 500 5K (MWCO) centrifugal filter units. Buffer exchange was performed at 4 °C for six rounds of concentration/dilution over the course of  $\sim$ 90 min. For the study of KaiB tetramerization, we determined the concentration of a stock solution in ammonium acetate (buffer exchanged directly from KaiB stock solution in RB without additional incubation steps) from the absorbance at a wavelength of 280 nm, using the KaiB sequence to estimate the extinction coefficient. This stock solution was diluted in 75 mM ammonium acetate to arrive at the concentrations as indicated in Fig. 1B. With the KaiC and KaiCB samples, a total volume of 50  $\mu\text{L}$  for each

sample was incubated for either 6 h or 7 d at 30 °C or 4 °C in RB, respectively. The KaiC concentration in RB was 3  $\mu\text{M}$  in all samples, and the KaiB concentration was 3  $\mu\text{M}$  in the 30 °C sample and 9  $\mu\text{M}$  in the 4 °C sample. After the final round of concentration for buffer exchange, the total volumes had been reduced to 25  $\mu\text{L}$ . We estimated a sample loss on the order of 50%, yielding similar final concentration in the buffer-exchanged samples. The Kai samples were kept on ice until analyzed. Samples were loaded into gold-coated boro-silicate capillaries prepared in-house. KaiB tetramerization was studied on an LCT1 (Micromass; Waters, U.K.) with elevated source pressure (7–9 mbar) for optimal transmission of larger complexes (1). Capillary voltage was set between 1,200–1,400 V, and the cone voltage at 160 V. KaiC/KaiCB complexes were analyzed on a modified QToF II (MS Vision; Waters, U.K.), operated at 10 mbar source pressure, 1,300–1,500 V capillary voltage, 160 V cone voltage, 50 V collision energy with  $1\text{--}2 \times 10^{-2}$  mbar pressure in the collision cell using xenon as collision gas (2, 3). Tandem MS spectra were acquired at a collision energy of 80 V. KaiC phosphorylation was determined by dividing the mass deviations stated in Table S1 by the theoretical mass of 12 phosphorylations (960 Da). Ion mobility spectrometry was performed on a Synapt G1 (Waters, U.K.) operated at 9 mbar source pressure. Capillary voltage was set at 1,300 V, cone voltage at 160 V, and TRAP/TRANSFER at 10/30 V collision energy, with a pressure of  $1\text{--}2 \times 10^{-2}$  mbar pressure using xenon as collision gas. Traveling wave ion mobility was performed using a wave height of 2–12 V ramped over 60% of the cycle, with nitrogen as buffer gas at a pressure of  $5.55 \times 10^{-1}$  mbar. The collisional cross-section was calibrated using denatured ubiquitin, cytochrome C, and myoglobin, as well as native GroEL (4, 5). The reported cross-sections and 95% confidence intervals are based on four replicate analyses. Theoretical cross-sections were calculated with the Driftscope Projection Approximation algorithm (Waters, U.K.).

**Hydrogen-Deuterium Exchange MS.** In hydrogen-deuterium exchange (HDX)-MS, proteins are transferred into a deuterated solution, resulting in the exchange of backbone amide protons for deuterons from the solution. After quenching the reaction before rapid proteolytic digestion, the levels of deuterium uptake can be determined for all of the resulting peptide products using MS. The observed deuterium uptake can then be mapped back onto the amino acid sequence. Because deuterium uptake is largely determined by solvent exposure and secondary structure, binding interfaces and (allosteric) structural transitions can be observed with HDX-MS.

HDX-MS was performed on free KaiC, free KaiB, and two distinct KaiCB mixtures. Free KaiC and free KaiB were incubated for 1 wk at 4 °C in RB at a concentration of 30  $\mu\text{M}$  to match the incubations of the KaiCB complexes. Bound KaiB was prepared by incubating 30  $\mu\text{M}$  KaiB in the presence of 90  $\mu\text{M}$  KaiC for 1 wk at 4 °C in RB. Similarly, for bound KaiC, 30  $\mu\text{M}$  KaiC was incubated in the presence of 90  $\mu\text{M}$  KaiB for 1 wk at 4 °C in RB. The HDX reaction was started by diluting the above stock solutions 20-fold to a final volume of 40  $\mu\text{L}$  in  $\text{D}_2\text{O}$ . The reaction was carried out on ice for 1, 10, and 60 min before quenching by 2:1 dilution into ice-cold 6 M guanidine-HCl, 300 mM Tris (2-carboxyethyl) phosphine, with pH adjusted to give a final pH of 2.5.

Immediately after quenching, the sample was injected into a Waters HDX/ nanoAcquity system for digestion on an online

pepsin column (25 °C, at a flow rate of 50  $\mu\text{L}\cdot\text{min}^{-1}$ ) followed by separation on a 10-min RP-UPLC gradient at 0 °C and MS on a Waters Xevo QToF G2. For peptide identification, samples of KaiC and KaiB were prepared under identical conditions in  $\text{H}_2\text{O}$  and analyzed using MS<sup>6</sup> data acquisition. Data for peptide identification was processed with ProteinLynx Global Server 2.5 software. Deuterium uptake was calculated compared with the control samples in  $\text{H}_2\text{O}$  using Waters DynamX 1.0.0 software.

The experiments were performed in triplicate. HDX-MS was performed in time-course experiments with 0-, 1-, 10-, and 60-min exposure to  $\text{D}_2\text{O}$ . For KaiB, 29 peptides could be identified and quantified after digestion with pepsin, covering 96% of the full sequence (Fig. S3). For KaiC, 119 peptides could be identified and quantified, covering 92% of the full sequence (Fig. S4). The experiments were performed in triplicate. The kinetics of deuterium uptake were similar between bound and unbound states, but there were substantial differences in total deuterium uptake, which is most clearly seen in the 60-min time points. Observed changes in deuterium uptake between two samples were filtered to  $P < 0.01$ , as calculated from pairwise two-tailed Student  $t$  testing between the 60-min time points. Overviews of the HDX-MS data, including  $P$  values for KaiB and KaiC, are provided in Tables S2 and S3, respectively.

1. Tahallah N, Pinkse M, Maier CS, Heck AJR (2001) The effect of the source pressure on the abundance of ions of noncovalent protein assemblies in an electrospray ionization orthogonal time-of-flight instrument. *Rapid Commun Mass Spectrom* 15(8):596–601.
2. van den Heuvel RHH, et al. (2006) Improving the performance of a quadrupole time-of-flight instrument for macromolecular mass spectrometry. *Anal Chem* 78(21):7473–7483.
3. Lorenzen K, Versluis C, van Duijn E, van den Heuvel RHH, Heck AJR (2007) Optimizing macromolecular tandem mass spectrometry of large non-covalent complexes using heavy collision gases. *Int J Mass Spectrom* 268(2–3):198–206.
4. Ruotolo BT, Benesch JLP, Sandercock AM, Hyung SJ, Robinson CV (2008) Ion mobility-mass spectrometry analysis of large protein complexes. *Nat Protoc* 3(7):1139–1152.

**Structural Modeling and Analysis.** For KaiB we used the four monomers from the crystal structure (PDB ID code 4kso) to create an ensemble of four starting structures that was used as input for the docking, taking advantage of the ensemble docking ability of HADDOCK. Only one monomer (chain A) required homology modeling to rebuild the missing 7 Nter residues, based on the three other monomers. This was done using a multiple template approach with the MODELER package version 9.11 (6). For KaiC, we extracted a dimer from the available structure of *Synechococcus elongatus* KaiC (PDB ID code 3dvl). The docking simulations were performed using the HADDOCK web server (7) (<http://haddock.science.uu.nl/services/HADDOCK>). We generated 10,000/400/400 structures for the different it0/it1/water stages of HADDOCK. The HDX-MS information was mapped onto KaiB and KaiC solvent-accessible surfaces, resulting in two lists of active residues used to derive ambiguous interaction restraints (8). ATP and  $\text{Mg}^{2+}$  were restrained using specific geometrical distances derived from the crystal structure of KaiC. After clustering, all of the representative solutions were inspected and the top four clusters based on the HADDOCK score were considered for further analyzes and discussion (*Results*).

5. Bush MF, et al. (2010) Collision cross sections of proteins and their complexes: A calibration framework and database for gas-phase structural biology. *Anal Chem* 82(22):9557–9565.
6. Eswar N, et al. (2006) Comparative protein structure modeling using modeller. *Curr Protoc Bioinformatics* Chap 5, Unit 5.6.
7. de Vries SJ, van Dijk M, Bonvin AM (2010) The HADDOCK web server for data-driven biomolecular docking. *Nat Protoc* 5(5):883–897.
8. de Vries SJ, et al. (2007) HADDOCK versus HADDOCK: New features and performance of HADDOCK2.0 on the CAPRI targets. *Proteins* 69(4):726–733.

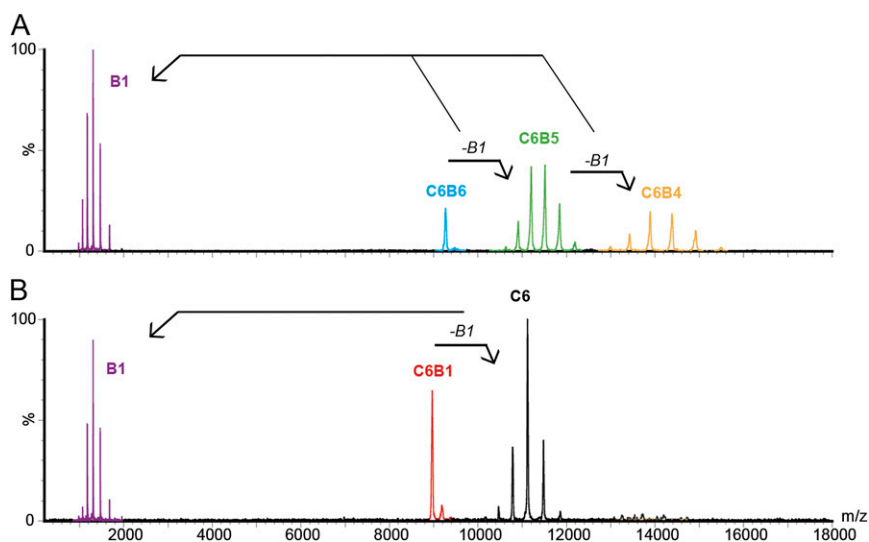

**Fig. S1.** Tandem MS analysis of KaiCB complexes. Single charge states of KaiCB complexes are selected from the MS1 spectra shown in *Results* (Fig. 2). Applying higher collision energies (80 V) results in the dissociation of highly charged KaiB subunits. The masses of all detected components are listed in Table S1. (A) Tandem MS of KaiC6B6 complexes; the mass of the first high  $m/z$  product ion corresponds to KaiC6B5 and the second high  $m/z$  product ion to KaiC6B4, thus confirming that the precursor is KaiC6B6. (B) Tandem MS of KaiC6B1. The dominant product ions corresponds to KaiC6 and B1, thus confirming that the precursor is KaiC6B1.

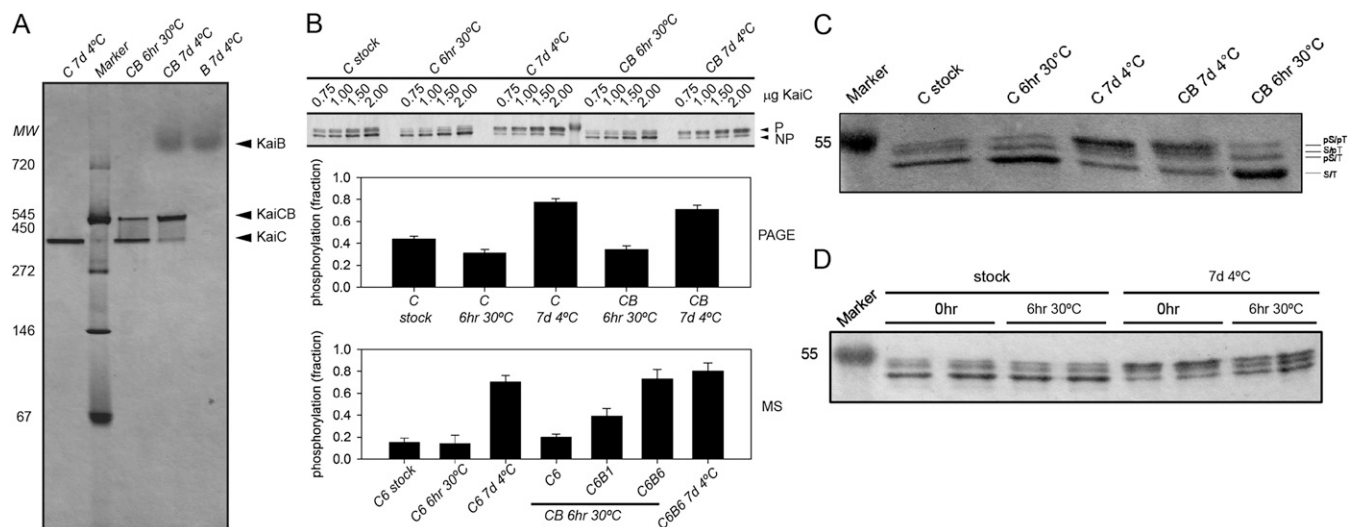

**Fig. S2.** Native PAGE and phosphorylation analysis of KaiCB complexes. (A) Native PAGE of KaiCB complexes under standard conditions and at reduced temperature. (B) SDS/PAGE and native MS analysis of KaiC phosphorylation. In the MS analyses of KaiC and KaiCB, substantial mass deviations were observed compared with theoretical masses calculated from the protein sequence (Table S1). These residual masses were interpreted as phosphorylation of KaiC. In SDS/PAGE, the phosphorylated forms of KaiC have a reduced mobility, allowing the phospholevels to be determined by densitometry. Low levels of phosphorylation were determined in KaiC input material. Similar levels were detected after incubating KaiC alone or in the presence of KaiB at 30 °C. Whereas SDS/PAGE yields one bulk value of KaiC phosphorylation in the KaiCB preparation under standard conditions, native MS can determine the individual phosphostates of all three detected components. Low phospholevels of free KaiC but high phospholevels in KaiC<sub>6</sub>B<sub>6</sub> were observed, confirming that KaiB binds preferentially to phosphorylated KaiC. Intermediate phospholevels were determined for the KaiC<sub>6</sub>B<sub>1</sub> complex, indicating again that phosphorylation is limiting to the formation of full KaiC<sub>6</sub>B<sub>6</sub> complexes. As reported previously, higher levels were detected when KaiC was incubated alone at 4 °C and similarly high levels were detected when KaiC was incubated in the presence of KaiB at 4 °C, thus explaining the higher propensity for KaiB binding. (C) Individual phosphostates can be distinguished, as indicated. After incubation at 4 °C, the pS/pT form of KaiC is most enriched in both KaiC and KaiCB preparations. (D) Aliquots from stock solution or after incubation at 4 °C were frozen at -20 °C while an additional 6-h incubation at 30 °C was carried out. Samples were loaded on gel to monitor phosphorylation. There is a decrease in the overall phosphorylation level of KaiC when incubated at 30 °C after 1 wk of incubation at 4 °C, indicating that the dephosphorylation activity was preserved.

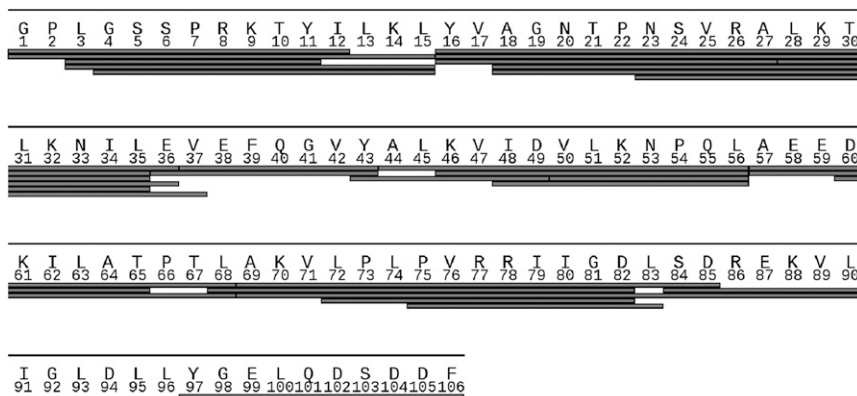

**Fig. S3.** Peptide analysis of pepsin-digested KaiB. A total of 29 peptides are identified with sufficient intensity for HDX analysis, covering 96% of the sequence. The 29 peptides used for HDX analysis are mapped onto the full sequence.

G P L G S T S A E M T S P N N N S E H O A I A K M R T M T E G F D D I S H G G L P I G R S T L V W S G T S G T G K T L F S  
 1 2 3 4 5 6 7 8 9 10 11 12 13 14 15 16 17 18 19 20 21 22 23 24 25 26 27 28 29 30 31 32 33 34 35 36 37 38 39 40 41 42 43 44 45 46 47 48 49 50 51 52 53 54 55 56 57 58 59 60  
 I Q F L Y N G I T E F D E P D G V F V T F E I E T P Q D I T K N A R S F G W D L A K L V D E G K L E F T L D A S P D P E F G Q E  
 61 62 63 64 65 66 67 68 69 70 71 72 73 74 75 76 77 78 79 80 81 82 83 84 85 86 87 88 89 90 91 92 93 94 95 96 97 98 99 100 101 102 103 104 105 106 107 108 109 110 111 112 113 114 115 116 117 118 119 120  
 V V G S F E D L S A I L T E R T N Y A T Q K Y S A R S V S I D S V T S V F Q Q Y D A S S V V R R E L F R L V A B L K Q T G S  
 121 122 123 124 125 126 127 128 129 130 131 132 133 134 135 136 137 138 139 140 141 142 143 144 145 146 147 148 149 150 151 152 153 154 155 156 157 158 159 160 161 162 163 164 165 166 167 168 169 170 171 172 173 174 175 176 177 178 179 180  
 T I V M T T E R I E E Y G P T A R Y G V E E F V S D N V V I L R N V L E G E R R R R T L E I L K L R G T I S H M K Q E Y P  
 181 182 183 184 185 186 187 188 189 190 191 192 193 194 195 196 197 198 199 200 201 202 203 204 205 206 207 208 209 210 211 212 213 214 215 216 217 218 219 220 221 222 223 224 225 226 227 228 229 230 231 232 233 234 235 236 237 238 239 240  
 F I T T D H G I N T I F P L G A M R L T Q R S S N V R V S G V R L D E M C G G G F F K D S I T L A T G A T G T G K T L  
 241 242 243 244 245 246 247 248 249 250 251 252 253 254 255 256 257 258 259 260 261 262 263 264 265 266 267 268 269 270 271 272 273 274 275 276 277 278 279 280 281 282 283 284 285 286 287 288 289 290 291 292 293 294 295 296 297 298 299 300  
 L V S R F V E N A C A N K E R A I L F A Y E E S R A Q L L R N A Y S W G M D E F E M E R Q N L L K I V C A Y P E S A G I  
 301 302 303 304 305 306 307 308 309 310 311 312 313 314 315 316 317 318 319 320 321 322 323 324 325 326 327 328 329 330 331 332 333 334 335 336 337 338 339 340 341 342 343 344 345 346 347 348 349 350 351 352 353 354 355 356 357 358 359 360  
 E D H L O I T I K S E T N D E K P A R T A I T D S I S A L A R G V S N N A F R R O F V I G V T G V A K O E E I T G L F N T S  
 361 362 363 364 365 366 367 368 369 370 371 372 373 374 375 376 377 378 379 380 381 382 383 384 385 386 387 388 389 390 391 392 393 394 395 396 397 398 399 400 401 402 403 404 405 406 407 408 409 410 411 412 413 414 415 416 417 418 419 420  
 D Q F M G A H S T I T D S H I S T I T D T I L L Q Y V E T R G E M S R A I N V F K M R G S W H D K A T R E F E M T S D K G  
 421 422 423 424 425 426 427 428 429 430 431 432 433 434 435 436 437 438 439 440 441 442 443 444 445 446 447 448 449 450 451 452 453 454 455 456 457 458 459 460 461 462 463 464 465 466 467 468 469 470 471 472 473 474 475 476 477 478 479 480  
 P D I K D S F R N F E R I T S G S G A R S I T V W D E K S S R I V R G V Q E M G P E S  
 481 482 483 484 485 486 487 488 489 490 491 492 493 494 495 496 497 498 499 500 501 502 503 504 505 506 507 508 509 510 511 512 513 514 515 516 517 518 519 520 521 522 523  
 90% 494 of 523 - 93%  
 10% 484 of 523 - 93%

**Fig. S4.** Peptide analysis of pepsin-digested KaiC. A total of 119 peptides are identified with sufficient intensity for HDX analysis, covering 92% of the sequence. The 119 peptides used for HDX analysis are mapped onto the full sequence.

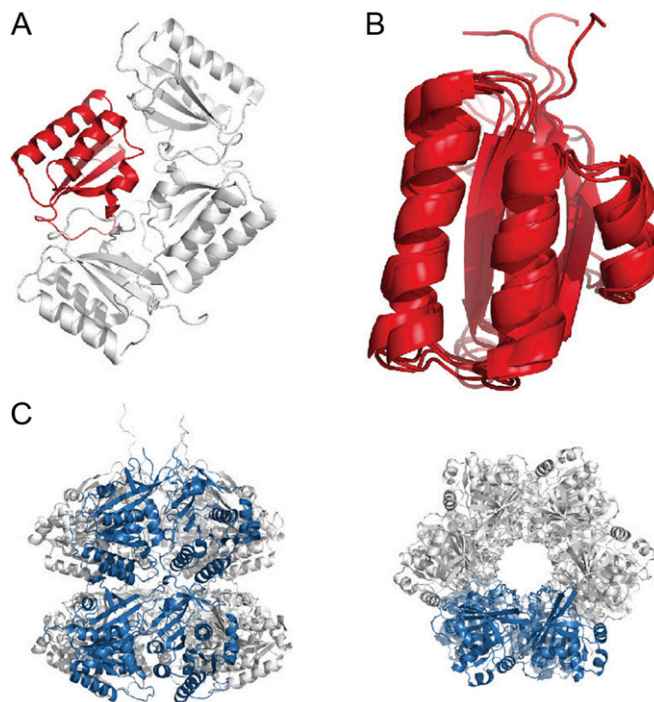

**Fig. S5.** Kai structures used for HADDOCK. (A) Crystal structure of KaiB (PDB ID code 4kso). (B) Ensemble of four monomer models of lowest energy for *S. elongatus* KaiB. The entire ensemble of four structures was used to dock on KaiC. (C) Side and top views of the KaiC structure used for HADDOCK. The crystal structure of KaiC (PDB ID code 3dvl) was used as a starting model. Two adjacent subunits were isolated from the full hexamer structure and the 13 first residues of the flexible C terminus were truncated.



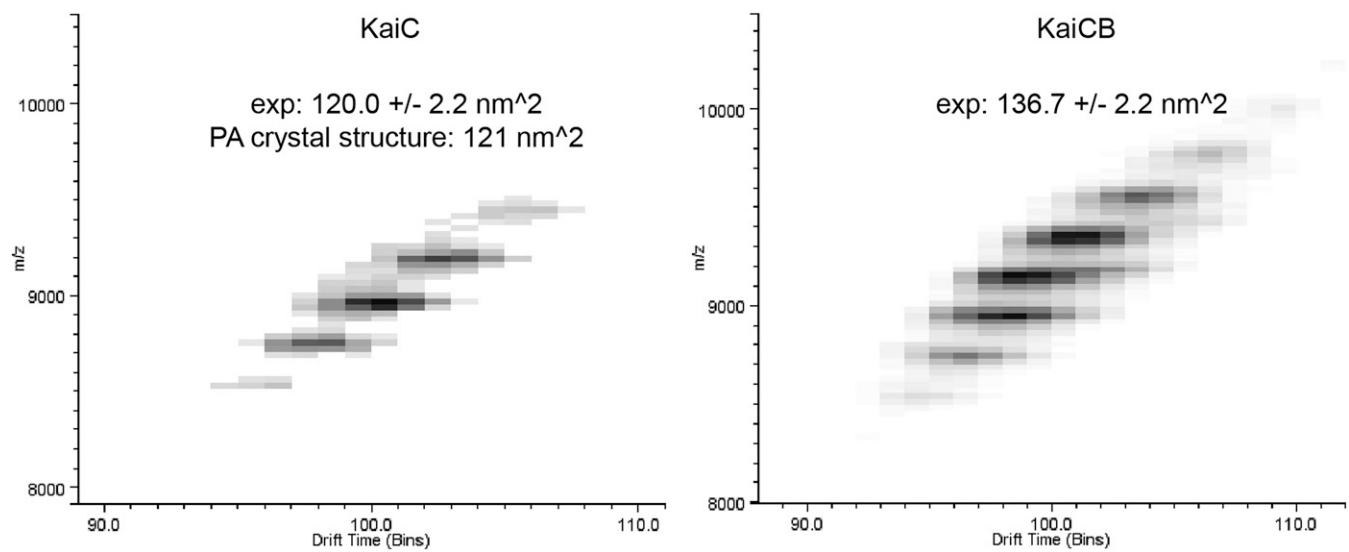

**Fig. S6.** Ion mobility MS of KaiC and KaiCB complexes. For both KaiC and KaiCB complexes, the drift-time vs.  $m/z$  contour plots are shown. The average collisional cross-sections for the complexes are indicated on the plots. For the KaiC hexamer, we calculated the theoretical collisional cross-section based on the crystal structure of KaiC (PDB ID code 3dvl).

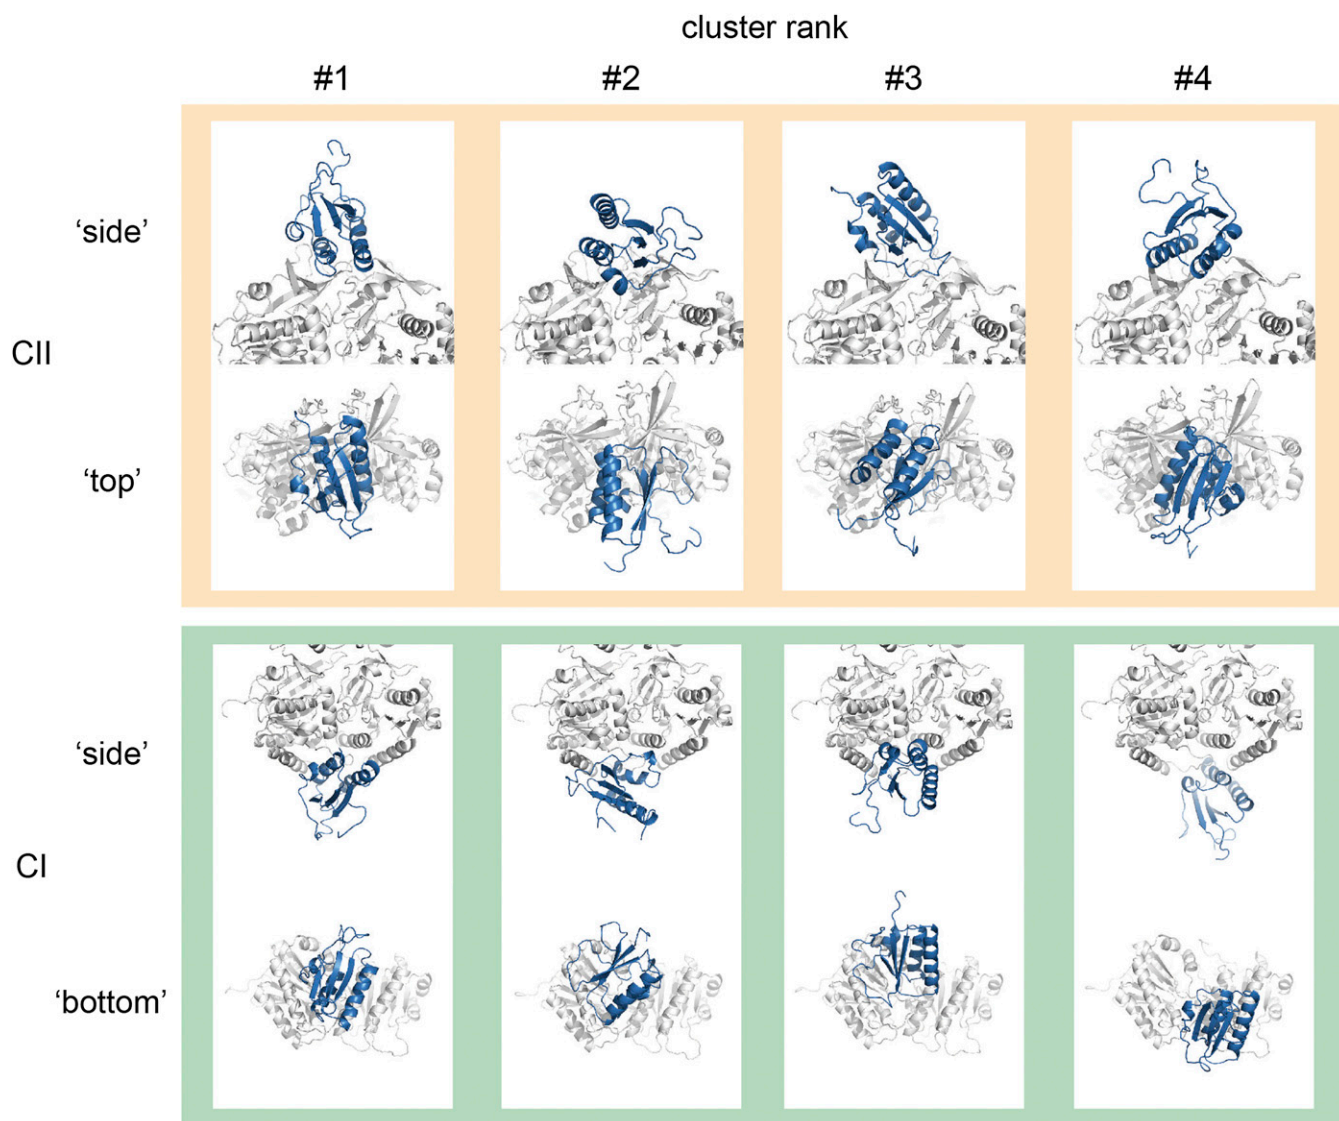

Fig. S7. Detailed views the four best-scoring HADDOCK cluster of KaiB–KaiC binding on either the protected region of the CII or CI domain.

**Table S1. Masses of Kai proteins and protein complexes**

| Complex             | Origin    | Mass/Da |    |                 |
|---------------------|-----------|---------|----|-----------------|
|                     |           | Average | SD | Mass deviation* |
| <b>KaiB</b>         |           |         |    |                 |
| B1                  | Stock     | 11,740  | 1  | 23              |
| B2                  |           | 23,481  | 1  | 47              |
| B4                  |           | 46,961  | 2  | 93              |
| <b>KaiC</b>         |           |         |    |                 |
| C6                  | Stock     | 355,922 | 38 | 140             |
|                     | 30 °C 6 h | 355,972 | 27 | 190             |
| <b>KaiCB</b>        |           |         |    |                 |
| C6B1                | 30 °C 6 h | 367,870 | 70 | 371             |
| C6B6                | 30 °C 6 h | 426,782 | 86 | 698             |
|                     | 4 °C 1 wk | 426,851 | 74 | 767             |
| <b>CID products</b> |           |         |    |                 |
| Precursor           |           |         |    |                 |
| C6                  | C6B1      | 355,827 | 42 | 45              |
| B1                  |           | 11,719  | 1  | 2               |
| C6B5                | C6B6      | 414,489 | 43 | 122             |
| C6B4                |           | 402,729 | 70 | 79              |

\*The mass deviation is calculated from theoretical masses of 11,717 Da for KaiB and 58,283 Da for KaiC. All KaiC assemblies are assumed to have 12 ATP (507 Da) bound. CID, collision-induced dissociation.

**Table S2. HDX-MS analysis of KaiB: free vs. KaiC-bound**

| Peptide Residue <sup>†</sup> |     | Relative deuterium uptake* |        |        |       |        |        |                                                |                      |
|------------------------------|-----|----------------------------|--------|--------|-------|--------|--------|------------------------------------------------|----------------------|
|                              |     | Free                       |        |        | Bound |        |        | Difference                                     |                      |
| Start                        | End | 1 min                      | 10 min | 60 min | 1 min | 10 min | 60 min | Bound <sub>60min</sub> – Free <sub>60min</sub> | P value <sup>‡</sup> |
| -3                           | 8   | 0.46                       | 0.51   | 0.58   | 0.60  | 0.65   | 0.68   | -0.10                                          | 0.0003               |
| -1                           | 7   | 0.53                       | 0.59   | 0.67   | 0.67  | 0.74   | 0.74   | -0.08                                          | 0.0267               |
| -3                           | 11  | 0.27                       | 0.31   | 0.38   | 0.38  | 0.42   | 0.44   | -0.07                                          | 0.0256               |
| -1                           | 11  | 0.27                       | 0.31   | 0.38   | 0.36  | 0.40   | 0.45   | -0.06                                          | 0.0012               |
| 0                            | 11  | 0.28                       | 0.33   | 0.40   | 0.40  | 0.45   | 0.47   | -0.06                                          | 0.0054               |
| 12                           | 23  | 0.31                       | 0.51   | 0.58   | 0.25  | 0.38   | 0.48   | 0.11                                           | 0.0029               |
| 12                           | 31  | 0.15                       | 0.30   | 0.42   | 0.12  | 0.23   | 0.31   | 0.10                                           | 0.0023               |
| 12                           | 32  | 0.15                       | 0.31   | 0.43   | 0.12  | 0.24   | 0.33   | 0.10                                           | 0.0057               |
| 14                           | 31  | 0.15                       | 0.33   | 0.43   | 0.12  | 0.22   | 0.31   | 0.12                                           | 0.0003               |
| 14                           | 32  | 0.16                       | 0.33   | 0.49   | 0.12  | 0.23   | 0.34   | 0.15                                           | 0.0001               |
| 19                           | 33  | 0.20                       | 0.31   | 0.43   | 0.12  | 0.23   | 0.32   | 0.11                                           | 0.0024               |
| 24                           | 31  | 0.07                       | 0.20   | 0.30   | 0.09  | 0.22   | 0.28   | 0.02                                           | 0.2929               |
| 32                           | 39  | 0.37                       | 0.47   | 0.54   | 0.44  | 0.57   | 0.64   | -0.11                                          | <0.0001              |
| 33                           | 39  | 0.34                       | 0.44   | 0.51   | 0.39  | 0.52   | 0.56   | -0.05                                          | <0.0001              |
| 39                           | 45  | 0.28                       | 0.37   | 0.43   | 0.34  | 0.38   | 0.39   | 0.04                                           | 0.5728               |
| 40                           | 52  | 0.18                       | 0.31   | 0.40   | 0.20  | 0.30   | 0.36   | 0.04                                           | 0.0976               |
| 42                           | 52  | 0.18                       | 0.31   | 0.40   | 0.19  | 0.29   | 0.35   | 0.05                                           | 0.0019               |
| 44                           | 52  | 0.16                       | 0.31   | 0.39   | 0.19  | 0.30   | 0.36   | 0.02                                           | 0.2624               |
| 46                           | 52  | 0.26                       | 0.47   | 0.56   | 0.26  | 0.45   | 0.56   | 0.00                                           | 0.8591               |
| 53                           | 61  | 0.15                       | 0.22   | 0.29   | 0.20  | 0.25   | 0.30   | -0.01                                          | 0.6631               |
| 53                           | 64  | 0.14                       | 0.23   | 0.33   | 0.12  | 0.16   | 0.22   | 0.12                                           | 0.0009               |
| 56                           | 64  | 0.14                       | 0.27   | 0.38   | 0.10  | 0.17   | 0.25   | 0.13                                           | 0.0049               |
| 64                           | 78  | 0.23                       | 0.36   | 0.48   | 0.16  | 0.29   | 0.41   | 0.08                                           | 0.0360               |
| 65                           | 81  | 0.24                       | 0.38   | 0.51   | 0.21  | 0.32   | 0.43   | 0.08                                           | 0.0134               |
| 68                           | 78  | 0.28                       | 0.45   | 0.58   | 0.17  | 0.27   | 0.45   | 0.12                                           | 0.0038               |
| 71                           | 79  | 0.27                       | 0.43   | 0.55   | 0.18  | 0.29   | 0.43   | 0.12                                           | 0.0079               |
| 65                           | 86  | 0.23                       | 0.40   | 0.50   | 0.23  | 0.37   | 0.47   | 0.03                                           | 0.0030               |
| 80                           | 88  | 0.24                       | 0.33   | 0.44   | 0.25  | 0.47   | 0.59   | -0.15                                          | 0.0017               |
| 93                           | 102 | 0.38                       | 0.39   | 0.40   | 0.34  | 0.36   | 0.38   | 0.02                                           | 0.2981               |

\*Relative deuterium uptake was determined as a fraction of maximum uptake (number of residues in the peptide minus one, minus prolines) and is reported as the average of triplicate experiments.

<sup>†</sup>Residues are numbered according to wild-type *S. elongatus* sequence. Numbering starts at -4 to account for the missing N-terminal methionine and the extra residual GST-tag amino acids (five residues).

<sup>‡</sup>P values from pairwise two-tailed Student *t* testing between the 60-min time points.





Table S3. Cont.

| Peptide Residue <sup>†</sup> |     | Relative deuterium uptake* |        |        |       |        |        |                                                |        |                      |
|------------------------------|-----|----------------------------|--------|--------|-------|--------|--------|------------------------------------------------|--------|----------------------|
|                              |     | Free                       |        |        | Bound |        |        | Difference                                     |        | P value <sup>‡</sup> |
| Start                        | End | 1 min                      | 10 min | 60 min | 1 min | 10 min | 60 min | Bound <sub>60min</sub> – Free <sub>60min</sub> |        |                      |
| 292                          | 302 | 0.12                       | 0.25   | 0.34   | 0.09  | 0.19   | 0.25   | 0.09                                           | 0.0228 |                      |
| 298                          | 314 | 0.07                       | 0.09   | 0.16   | 0.06  | 0.09   | 0.13   | 0.03                                           | 0.6099 |                      |
| 302                          | 314 | 0.10                       | 0.13   | 0.22   | 0.09  | 0.14   | 0.21   | 0.01                                           | 0.5741 |                      |
| 304                          | 314 | 0.09                       | 0.13   | 0.22   | 0.08  | 0.13   | 0.20   | 0.02                                           | 0.4009 |                      |
| 306                          | 314 | 0.08                       | 0.11   | 0.16   | 0.07  | 0.08   | 0.19   | -0.03                                          | 0.3148 |                      |
| 315                          | 324 | 0.26                       | 0.40   | 0.42   | 0.19  | 0.28   | 0.34   | 0.08                                           | 0.0264 |                      |
| 317                          | 324 | 0.28                       | 0.41   | 0.45   | 0.21  | 0.30   | 0.38   | 0.06                                           | 0.0528 |                      |
| 325                          | 334 | 0.19                       | 0.28   | 0.34   | 0.14  | 0.18   | 0.23   | 0.11                                           | 0.0544 |                      |
| 325                          | 335 | 0.15                       | 0.23   | 0.30   | 0.09  | 0.11   | 0.13   | 0.16                                           | 0.0197 |                      |
| 338                          | 344 | 0.09                       | 0.10   | 0.16   | 0.06  | 0.08   | 0.13   | 0.03                                           | 0.1464 |                      |
| 344                          | 356 | 0.31                       | 0.42   | 0.45   | 0.25  | 0.31   | 0.38   | 0.07                                           | 0.0677 |                      |
| 345                          | 356 | 0.32                       | 0.44   | 0.47   | 0.24  | 0.32   | 0.40   | 0.07                                           | 0.0238 |                      |
| 345                          | 358 | 0.32                       | 0.42   | 0.43   | 0.25  | 0.32   | 0.40   | 0.03                                           | 0.0076 |                      |
| 350                          | 356 | 0.38                       | 0.51   | 0.54   | 0.30  | 0.38   | 0.46   | 0.09                                           | 0.1591 |                      |
| 343                          | 369 | 0.16                       | 0.23   | 0.25   | 0.14  | 0.18   | 0.22   | 0.03                                           | 0.0113 |                      |
| 357                          | 380 | 0.07                       | 0.09   | 0.12   | 0.06  | 0.09   | 0.12   | 0.00                                           | 0.8445 |                      |
| 361                          | 377 | 0.08                       | 0.11   | 0.13   | 0.07  | 0.10   | 0.13   | 0.00                                           | 0.0683 |                      |
| 359                          | 380 | 0.09                       | 0.11   | 0.13   | 0.11  | 0.11   | 0.11   | 0.02                                           | 0.7616 |                      |
| 361                          | 380 | 0.09                       | 0.12   | 0.14   | 0.08  | 0.10   | 0.13   | 0.02                                           | 0.0231 |                      |
| 361                          | 382 | 0.10                       | 0.14   | 0.17   | 0.08  | 0.11   | 0.14   | 0.03                                           | 0.0214 |                      |
| 366                          | 380 | 0.06                       | 0.08   | 0.10   | 0.05  | 0.08   | 0.08   | 0.02                                           | 0.0489 |                      |
| 370                          | 380 | 0.07                       | 0.08   | 0.09   | 0.06  | 0.07   | 0.08   | 0.01                                           | 0.1628 |                      |
| 381                          | 391 | 0.36                       | 0.49   | 0.51   | 0.36  | 0.42   | 0.48   | 0.03                                           | 0.1444 |                      |
| 381                          | 394 | 0.30                       | 0.47   | 0.52   | 0.31  | 0.38   | 0.46   | 0.07                                           | 0.0571 |                      |
| 383                          | 392 | 0.38                       | 0.51   | 0.55   | 0.34  | 0.43   | 0.52   | 0.03                                           | 0.3390 |                      |
| 383                          | 394 | 0.33                       | 0.51   | 0.57   | 0.30  | 0.43   | 0.49   | 0.08                                           | 0.0085 |                      |
| 384                          | 394 | 0.35                       | 0.49   | 0.57   | 0.34  | 0.42   | 0.50   | 0.07                                           | 0.0199 |                      |
| 392                          | 398 | 0.07                       | 0.10   | 0.12   | 0.06  | 0.07   | 0.09   | 0.03                                           | 0.0073 |                      |
| 392                          | 401 | 0.05                       | 0.07   | 0.09   | 0.05  | 0.06   | 0.07   | 0.02                                           | 0.0274 |                      |
| 385                          | 411 | 0.15                       | 0.21   | 0.23   | 0.13  | 0.17   | 0.20   | 0.03                                           | 0.1142 |                      |
| 395                          | 401 | 0.07                       | 0.07   | 0.08   | 0.06  | 0.06   | 0.07   | 0.01                                           | 0.3904 |                      |
| 395                          | 402 | 0.06                       | 0.08   | 0.11   | 0.02  | 0.06   | 0.09   | 0.02                                           | 0.1894 |                      |
| 399                          | 411 | 0.11                       | 0.16   | 0.24   | 0.11  | 0.15   | 0.22   | 0.02                                           | 0.3334 |                      |
| 403                          | 411 | 0.10                       | 0.14   | 0.19   | 0.10  | 0.14   | 0.17   | 0.01                                           | 0.2903 |                      |
| 412                          | 418 | 0.35                       | 0.44   | 0.45   | 0.27  | 0.36   | 0.44   | 0.01                                           | 0.7931 |                      |
| 412                          | 419 | 0.34                       | 0.39   | 0.39   | 0.28  | 0.33   | 0.37   | 0.02                                           | 0.6262 |                      |
| 412                          | 432 | 0.32                       | 0.41   | 0.46   | 0.34  | 0.37   | 0.42   | 0.04                                           | 0.1972 |                      |
| 423                          | 432 | 0.38                       | 0.46   | 0.47   | 0.40  | 0.44   | 0.48   | 0.00                                           | 0.8484 |                      |
| 423                          | 435 | 0.32                       | 0.39   | 0.43   | 0.27  | 0.34   | 0.39   | 0.04                                           | 0.0867 |                      |
| 440                          | 449 | 0.33                       | 0.47   | 0.48   | 0.24  | 0.29   | 0.36   | 0.13                                           | 0.0050 |                      |
| 443                          | 449 | 0.41                       | 0.54   | 0.55   | 0.31  | 0.38   | 0.44   | 0.11                                           | 0.0107 |                      |
| 443                          | 452 | 0.39                       | 0.49   | 0.53   | 0.26  | 0.35   | 0.42   | 0.11                                           | 0.0041 |                      |
| 450                          | 456 | 0.07                       | 0.12   | 0.16   | 0.04  | 0.07   | 0.10   | 0.06                                           | 0.0749 |                      |
| 456                          | 469 | 0.23                       | 0.33   | 0.35   | 0.15  | 0.20   | 0.24   | 0.11                                           | 0.0086 |                      |
| 463                          | 477 | 0.02                       | 0.11   | 0.12   | 0.01  | 0.04   | 0.09   | 0.04                                           | 0.1065 |                      |
| 470                          | 483 | 0.35                       | 0.44   | 0.45   | 0.32  | 0.37   | 0.41   | 0.03                                           | 0.0286 |                      |
| 470                          | 486 | 0.39                       | 0.48   | 0.49   | 0.35  | 0.41   | 0.46   | 0.03                                           | 0.0712 |                      |
| 470                          | 487 | 0.39                       | 0.49   | 0.50   | 0.37  | 0.42   | 0.48   | 0.02                                           | 0.2411 |                      |
| 471                          | 486 | 0.34                       | 0.44   | 0.45   | 0.33  | 0.39   | 0.44   | 0.01                                           | 0.4043 |                      |
| 472                          | 486 | 0.41                       | 0.50   | 0.52   | 0.38  | 0.44   | 0.49   | 0.04                                           | 0.1146 |                      |
| 487                          | 497 | 0.47                       | 0.61   | 0.61   | 0.39  | 0.56   | 0.63   | -0.02                                          | 0.3929 |                      |
| 487                          | 500 | 0.50                       | 0.65   | 0.66   | 0.48  | 0.60   | 0.69   | -0.03                                          | 0.2637 |                      |
| 487                          | 501 | 0.50                       | 0.63   | 0.63   | 0.48  | 0.60   | 0.64   | -0.01                                          | 0.6437 |                      |
| 487                          | 505 | 0.47                       | 0.59   | 0.61   | 0.45  | 0.54   | 0.58   | 0.03                                           | 0.2964 |                      |
| 494                          | 501 | 0.43                       | 0.57   | 0.55   | 0.46  | 0.54   | 0.58   | -0.03                                          | 0.2037 |                      |
| 506                          | 519 | 0.53                       | 0.69   | 0.66   | 0.58  | 0.63   | 0.67   | -0.01                                          | 0.5507 |                      |

\*Relative deuterium uptake was determined as a fraction of maximum uptake (number of residues in the peptide minus prolines) and is reported as the average of triplicate experiments.

<sup>†</sup>Residues are numbered according to wild-type *S. elongatus* sequence. Numbering starts at -4 to account for the missing N-terminal methionine and the extra residual GST-tag amino acids (five residues).

<sup>‡</sup>P values from pairwise two-tailed Student *t* testing between the 60-min time points.

**Table S4. HADDOCK scores**

| Cluster rank | Haddock score    | Nstruc | Eelec              | Evdw             | BSA                | Edesolv         |
|--------------|------------------|--------|--------------------|------------------|--------------------|-----------------|
| <b>CII</b>   |                  |        |                    |                  |                    |                 |
| 1            | $-76.0 \pm 0.3$  | 76     | $-759.1 \pm 76.0$  | $-56.1 \pm 9.8$  | $2533.9 \pm 58.1$  | $60.7 \pm 10.5$ |
| 2            | $-45.4 \pm 4.7$  | 14     | $-490.0 \pm 37.0$  | $-68.7 \pm 10.1$ | $2336.1 \pm 166.2$ | $47.7 \pm 15.9$ |
| 3            | $-42.6 \pm 10.1$ | 15     | $-357.1 \pm 60.1$  | $-77.2 \pm 7.2$  | $2328.8 \pm 60.8$  | $44.0 \pm 10.8$ |
| 4            | $-42.0 \pm 9.7$  | 19     | $-675.2 \pm 106.1$ | $-43.8 \pm 11.2$ | $2222.2 \pm 159.9$ | $61.0 \pm 10.5$ |
| <b>CI</b>    |                  |        |                    |                  |                    |                 |
| 1            | $-48.1 \pm 9.1$  | 61     | $-575.8 \pm 50.3$  | $-73.4 \pm 9.5$  | $2676.1 \pm 150.5$ | $52.1 \pm 5.7$  |
| 2            | $-47.9 \pm 6.1$  | 35     | $-472.2 \pm 98.0$  | $-82.2 \pm 6.0$  | $2843.6 \pm 164.5$ | $53.5 \pm 21.0$ |
| 3            | $-45.6 \pm 5.5$  | 20     | $-488.3 \pm 69.2$  | $-90.2 \pm 7.5$  | $2936.8 \pm 238.1$ | $59.3 \pm 6.7$  |
| 4            | $-42.9 \pm 15.4$ | 15     | $-543.4 \pm 125.2$ | $-61.8 \pm 4.3$  | $2189.3 \pm 183.0$ | $37.5 \pm 17.1$ |

Scoring statistics of the models presented and evaluated in Fig. 5. Here we report the averaged HADDOCK scores for the four top-ranked models of each cluster (standard in HADDOCK analysis), the size of the clusters (Nstruc) and the contribution of different energy terms to the final HADDOCK score: Eelec (electrostatic energy), Evdw (van der Waals), BSA (buried surface area), and Edesolv (desolvation energy).

**Table S5. Intermolecular contacts observed in cluster 1 (CII binding)**

| Frequency | Interacting residues |       | Hydrogen bonds |          |          | Nonbonded |
|-----------|----------------------|-------|----------------|----------|----------|-----------|
|           | KaiB                 | KaiC  | M-M            | S-S      | M-S      |           |
| 0.5       | P12                  | E276' | —              | —        | —        | <b>X</b>  |
| 0.3       | N19                  | E276' | —              | —        | <b>X</b> | —         |
| 0.9       | N19                  | W466' | —              | —        | —        | <b>X</b>  |
| 0.7       | R22                  | R273' | —              | —        | —        | <b>X</b>  |
| 0.8       | R22                  | E276' | —              | <b>X</b> | —        | <b>X</b>  |
| 0.8       | K25                  | D485' | —              | <b>X</b> | —        | —         |
| 0.9       | T26                  | R472' | —              | <b>X</b> | —        | —         |
| 0.6       | T26                  | D485' | —              | <b>X</b> | —        | —         |
| 0.6       | T26                  | R488' | —              | —        | —        | <b>X</b>  |
| 0.6       | N29                  | D485' | —              | <b>X</b> | —        | —         |
| 0.4       | N29                  | R488' | —              | —        | <b>X</b> | <b>X</b>  |
| 0.3       | I29                  | R488' | —              | —        | —        | <b>X</b>  |
| 0.3       | E34                  | R488' | —              | <b>X</b> | —        | —         |
| 0.5       | E34                  | R450  | —              | <b>X</b> | —        | <b>X</b>  |
| 0.5       | E34                  | R500  | —              | <b>X</b> | —        | —         |
| 0.3       | A65                  | K484  | —              | —        | —        | <b>X</b>  |
| 0.4       | K66                  | D485  | —              | <b>X</b> | —        | —         |
| 0.6       | L70                  | E473  | —              | —        | —        | <b>X</b>  |
| 0.4       | L70                  | D485  | —              | —        | —        | <b>X</b>  |
| 0.8       | L70                  | F487  | —              | —        | —        | <b>X</b>  |
| 0.4       | P71                  | R450  | —              | —        | —        | <b>X</b>  |
| 0.4       | R73                  | K484  | —              | —        | <b>X</b> | <b>X</b>  |
| 0.4       | R73                  | D485  | —              | <b>X</b> | —        | <b>X</b>  |
| 0.6       | R74                  | E452  | —              | <b>X</b> | —        | <b>X</b>  |
| 0.6       | R74                  | S454  | —              | —        | —        | <b>X</b>  |
| 0.7       | R74                  | E473  | —              | <b>X</b> | —        | <b>X</b>  |
| 0.3       | R74                  | M475  | —              | —        | —        | <b>X</b>  |
| 0.3       | I75                  | E452  | —              | —        | —        | <b>X</b>  |
| 0.6       | G77                  | M475  | —              | —        | —        | <b>X</b>  |
| 0.8       | D78                  | W466  | —              | <b>X</b> | —        | —         |
| 0.3       | L79                  | W466  | —              | —        | —        | <b>X</b>  |
| 0.4       | D81                  | S477  | —              | <b>X</b> | —        | <b>X</b>  |
| 0.6       | D81                  | K479  | —              | <b>X</b> | —        | <b>X</b>  |
| 1         | R82                  | W466  | —              | —        | —        | <b>X</b>  |
| 0.3       | R82                  | M475  | —              | —        | —        | <b>X</b>  |
| 0.3       | R82                  | I476  | —              | —        | <b>X</b> | —         |
| 0.5       | R82                  | S477  | —              | —        | —        | <b>X</b>  |
| 0.3       | E83                  | W466  | —              | —        | —        | <b>X</b>  |
| 0.9       | K84                  | D478  | —              | <b>X</b> | —        | —         |

List of intermolecular contacts between KaiC and KaiB based on an analysis of the 10 best models of the top-ranking HADDOCK cluster (#1\_CII). All contacts were analyzed using DIMPLOT. The frequency of a pairwise contact corresponds to its occurrence observed among the top 10 models of cluster #1\_CII. For the hydrogen bonds, M refers to the main chain and S refers to the side chain. KaiC residues labeled with a prime indicate residues from the second chain in the model.
